# Supplementary material
Source: Springer Nature journal article supplement (https://www.springermedizin.de/resource/supplementary/12874_2010_544_MOESM2_ESM.pdf/9432450)
Supplement: MOESM2 [file 9432450]

As explained in the cover letter, we were unable to recruit the required number of patients for this study with acute low-back pain. We attempted to recruit patients in your practice from November 2007 to June 2008. We placed posters and postcards in your waiting room, and also asked you to approach patients directly. We would like your comments and thoughts about this recruitment process.

1 During the study period (Nov 2007 to June 2008), I recall inviting approximately this number of patients with acute low-back pain to participate in the IMPLEMENT study

2 I intended to approach eligible patients for the IMPLEMENT study *Strongly disagree* 1 2 3 4 5 6 7 *Strongly agree*

3 During the study period I did not see any patients with acute non-specific low-back pain who would have been eligible for the study *Strongly disagree* 1 2 3 4 5 6 7 *Strongly agree*

4 I do not recall seeing any posters or other recruitment material for the IMPLEMENT study in the waiting room of my practice *Strongly disagree* 1 2 3 4 5 6 7 *Strongly agree*

5 During the study period, I forgot to approach patients with acute low-back pain to participate in the IMPLEMENT study *Strongly disagree* 1 2 3 4 5 6 7 *Strongly agree*

6 During the study period, I approached patients with acute low-back pain to participate in the IMPLEMENT study, but they were not interested *Strongly disagree* 1 2 3 4 5 6 7 *Strongly agree*

7 We would appreciate any other comments you may have about the recruitment process for the IMPLEMENT study and your experiences with this. Specifically, was there anything further we could have done to assist you to recruit patients for this study? Please make any comments below:

---



---



---



---



---



---



---



---
